# Supplementary material
Source: Springer Nature journal article supplement (https://www.springermedizin.de/resource/supplementary/12931_2010_1036_MOESM5_ESM.pdf/9425374)

**Location of eosinophils at homeostasis**

**Suggested function (F) or pathology (P) of eosinophils and released ECP**

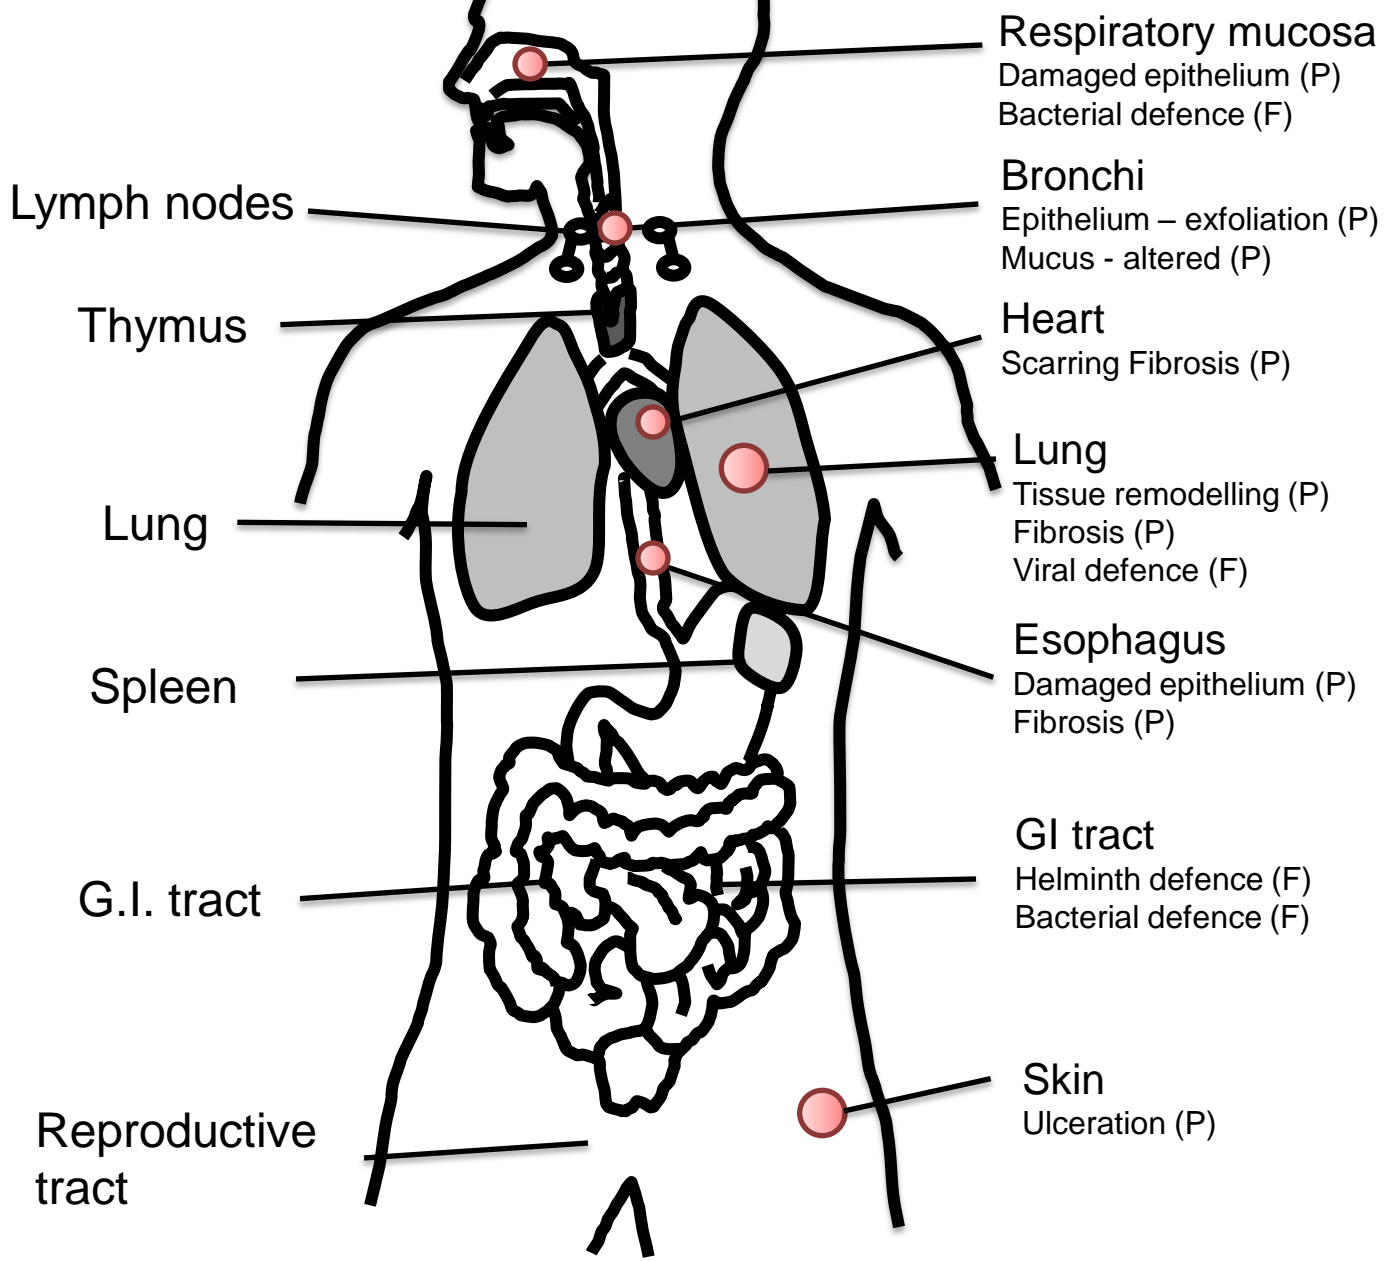

Supplement: MOESM5 [file 9425374]
